# Supplementary material for: Factors associated with contralateral liver hypertrophy after unilateral radioembolization for hepatocellular carcinoma
Source: PLoS One. 2017 Jul 14;12(7):e0181488. doi: 10.1371/journal.pone.0181488 (PMC5510860; doi:10.1371/journal.pone.0181488)
Supplement: S1 Table — (XLSX) [file pone.0181488.s001.xlsx]

## Sheet: Tabelle1
patient number	sex (0=male, 1=female)	underlying liver disease (0=non, 1=cryptogenic cirrhosis, 2=alcoholic liver disease, 3=chronic hepatitis B, 4=chronic hepatitis C, 5=NASH, 6=secondary biliary cirrhosis)	cirrhosis (0=no, 1=yes)	Child Pugh (at time of RE; 1=A, 2=B, 3=C)	Child Pugh points, at time of RE	ascites, before RE (0=non, 1=yes)	INR, before RE	albumine, before RE	thrombocytes, before RE [/mm³]	bilirubin, before RE	tumor burden of right liver lobe (1=0-25%, 2=26-50%, 3=51-75%, 4=>76%)	portocaval shunts (0=non, 1=yes)	portal vein thrombosis (0=non, 1=main trunc, 2=limited to right liver lobe, 3=limited to left liver lobe)	V0 left (volume of left liver lobe, before RE) [ml]	V0 right (volume of right liver lobe, before RE) [ml]	GV0 (volume whole liver, before RE) [ml]	rel.GV_V0 left lobe [% of current whole liver volume, before RE]	rel.GV_V0 right lobe [% of current whole liver volume, before RE]	spleen volume, before RE [ml]	V1 left (volume of left liver lobe, 1 month after RE) [ml]	GV1 (whole liver volume, 1 month after RE) [ml]	rel.GV_V1 left lobe [% of current whole liver volume, 1 month after RE] (links)	V1 right (volume of right liver lobe, 1 month after RE) [ml]	rel.GV_V1 right lobe [% of whole liver volume, 1 month after RE]	V3 left (volume of left liver lobe, 3 months after RE) [ml]	GV3 (whole liver volume, 3 months after RE) [ml]	rel.GV_V3 left lobe [% of current whole liver volume, 3 months after RE]	V3 right (volume of right liver lobe, 3 months after RE) [ml]	rel.GV_V3 right lobe [% of current whole liver volume, 3 months after RE]	V6 left (volume of left liver lobe, 6 months after RE) [ml]	GV6 (whole liver volume, 6 months after RE) [ml]	rel.GV_V6 left lobe [% of current whole liver volume, 6 months after RE]	V6 right (volume of right liver lobe, 6 months after RE) [ml]	rel.GV_V6 right lobe [% of current whole liver volume, 6 months after RE]	V9 left (volume of left liver lobe, 9 months after RE) [ml]	GV9 (whole liver volume, 9 months after RE) [ml]	rel.GV_V9 left lobe [% of current whole liver volume, 9 months after RE]	V9 right (volume of right liver lobe, 9 months after RE) [ml]	rel.GV_V9 right lobe [% of current whole liver volume, 9 months after RE]
49	0	4	1	1	6	1	1.11	4	101	0.6	1	1	0	1068.65	884.46	1953.11	54.7153	45.2847	700.72	1057.31	1851.43	57.1077	794.12	42.8923	1154.73	1696.32	68.0727	541.59	31.9273	1187.73	1672.12	71.0314	484.39	28.9686	1121.06	1602.41	69.9609	481.35	30.0391
18	0	1	1	1	5	0	1.02	4	356	0.5	2	0	0	399	1208	1607	24.8289	75.1711	198.34	419	1590	26.3522	1171	73.6478	604	1523	39.6586	919	60.3414	518	1302	39.7849	784	60.2151	554	1255	44.1434	701	55.8566
72	0	5	0			0	1	4.4	209	0.6	3	0	0	462.82	2101.19	2564.01	18.0506	81.9494	375.04	519.88	2797.77	18.5819	2277.89	81.4181	555.225	2770.07	20.0437	2214.85	79.9563	590.57	2742.37	21.535	2151.8	78.465	522.3	2666.85	19.5849	2144.55	80.4151
12	0	0	0			0	1.14	4.4	186	0.5	2	0	0	377	982	1359	27.741	72.259	120.25	443	1469	30.1566	1026	69.8434	512.86	1373.56	37.338	860.7	62.662	401.96	1003.28	40.0646	601.32	59.9354	421.46	1012.21	41.6376	590.75	58.3624
33	1	0	0			0	1.03	4.2	500	0.4	3	0	2	780.11	2736.51	3516.62	22.1835	77.8165	190.41	1015.07	4315.91	23.5193	3300.84	76.4807	1113.32	3773.75	29.5017	2660.43	70.4983	1132.65	3658.84	30.9565	2526.19	69.0435	1102.49	3880.05	28.4143	2777.57	71.5857
8	0	2	1	1	6	1	1.06	4.3	158	1.7	3	1	0	364	1951	2315	15.7235	84.2765	568.4	387	2098	18.4461	1711	81.5539	470	1976	23.7854	1506	76.2146	574	2064	27.8101	1490	72.1899	392.56	1574.54	24.9317	1181.98	75.0683
2	0	2	1	1	6	1	1.18	4.5	49	0.6	1	1	0	445	1502	1947	22.8557	77.1443	1646	485	2016	24.0575	1531	75.9425	502.228	1909.66	26.2993	1407.44	73.7007	537	1972	27.2312	1435	72.7688	643	1988	32.3441	1345	67.6559
26	1	5	0			0	0.96	4.5	355	0.3	2	0	0	1182	1173	2355	50.1911	49.8089	192.12	1352	2380	56.8067	1028	43.1933	1585	2618	60.5424	1033	39.4576	1665	2496	66.7067	831	33.2933	1673.12	2406.54	69.5239	733.42	30.4761
14	1	3	1	2	7	1	1.11	3.1	105	1.1	2	1	0	767.856	767.136	1534.99	50.0235	49.9765	770.568	749.52	1374.12	54.5455	624.6	45.4545	749.09	1145.36	65.4021	396.27	34.5979	730	1086	67.2192	356	32.7808	714	986	72.4138	272	27.5862
53	1	4	1	1	5	0	0.95	3.6	66	0.7	1	0	0	447.51	894.91	1342.42	33.3361	66.6639	477.07	447.73	1277.48	35.0479	829.75	64.9521	436.94	1094.56	39.9192	657.62	60.0808	421.59	1088.28	38.7391	666.69	61.2609	429.2	1003.69	42.7622	574.49	57.2378
75	0	5	1	1	6	1	1.16	4.2	128	1.2	2	0	0	385.14	1422.53	1807.67	21.3059	78.6941	440.55	420.64	1934.82	21.7405	1514.18	78.2595	500.37	1905.04	26.2656	1404.67	73.7344	539.29	1754.09	30.7447	1214.8	69.2553	565.9	1733.53	32.6444	1167.63	67.3556
23	0	3	1	2	7	0	1.28	3.3	61	2	1	1	0	671	641	1312	51.1433	48.8567	913.23	668	1331	50.1878	663	49.8122	718	1315	54.6008	597	45.3992	706	1204	58.6379	498	41.3621	625.6	1084.86	57.6664	459.26	42.3336
74	0	5	0			0	1.04	4.2	253	0.4	1	0	0	674.36	1930.22	2604.58	25.8913	74.1087	266.8	798.72	2619.57	30.4905	1820.85	69.5095	1189.03	2676.15	44.4306	1487.12	55.5694	1274.21	2345.37	54.3287	1071.16	45.6713	1661.44	2612.58	63.5938	951.14	36.4062
45	0	2	1	1	6	1	1.37	3.9	43	1.2	3	1	0	449.12	1491.52	1940.64	23.1429	76.8571	1496.87	498.42	2095.94	23.7803	1597.52	76.2197	491.15	2229.53	22.0293	1738.38	77.9707	372.69	1696.27	21.9711	1323.58	78.0289
55	0	5	1	1	5	0	0.99	4.1	81	1.5	4	0	2	1013.04	1698.91	2711.95	37.3547	62.6453	1024.18	1233.13	3055.77	40.3543	1822.63	59.6457	1284.71	3016.34	42.5916	1731.63	57.4084	1383.51	2876.58	48.0956	1493.07	51.9044	1348.08	2844.78	47.3878	1496.7	52.6122
71	0	4	1	1	5	0	0.96	4.6	189	0.7	1	0	0	544.7	954.59	1499.29	36.3305	63.6695	337.76	702.79	1805.51	38.9247	1102.72	61.0753	878.24	1653.99	53.0983	775.75	46.9017	959.03	1615.44	59.3665	656.41	40.6335	1027.07	1669.52	61.5189	642.45	38.4811
35	0	5	1	1	5	0	1.21	4.1	128	0.7	1	1	0	1187.19	939.48	2126.67	55.8239	44.1761	518.04	1452.53	2399.97	60.5228	947.44	39.4772	1317.54	2048.82	64.3073	731.28	35.6927	1431.98	1997.4	71.6922	565.42	28.3078	1568.77	2093.62	74.931	524.85	25.069
62	0	3	1	1	5	0	1.13	4.3	153	1.3	1	1	0	657.11	812.14	1469.25	44.7242	55.2758	745.8	814.77	1667.73	48.855	852.96	51.145	867.91	1480.43	58.6255	612.52	41.3745	900.66	1370.08	65.7378	469.42	34.2622	859.24	1223.74	70.2143	364.5	29.7857
22	1	1	1	1	5	0	0.99	4.4	212	0.3	1	0	0	847	1082	1929	43.9088	56.0912	263.37	895	1893	47.2795	998	52.7205	1132	2066	54.7919	934	45.2081	1254	1960	63.9796	706	36.0204	1520	1999	76.038	479	23.962
36	0	2	1	1	6	1	1.11	4.3	284	0.6	1	1	0	996.59	1365.02	2361.61	42.1996	57.8004	165.01	1130	2448.57	46.1494	1318.57	53.8506	1171.39	2258.14	51.8741	1086.75	48.1259	1274.23	2203.13	57.8373	928.9	42.1627
68	0	5	1	1	5	0	0.95	4.3	152	0.4	1	0	0	220.54	795.78	1016.32	21.6999	78.3001	172.57	242.33	1124.73	21.5456	882.4	78.4544	286.2	1087.19	26.3247	800.99	73.6753	280.91	1004.81	27.9565	723.9	72.0435	337.565	1212.75	27.8346	875.186	72.1654
44	0	2	1	1	6	1	1.03	3.9	137	0.7	1	0	0	979.73	1650.29	2630.02	37.2518	62.7482	817.53	1046.29	2461.12	42.5128	1414.83	57.4872	947.04	2196.95	43.107	1249.91	56.893	1035.27	2107.15	49.1313	1071.88	50.8687
50	1	4	1	2	7	1	1.13	3.4	70	1.1	1	0	0	753.49	1096.11	1849.6	40.738	59.262	896.69	771.86	1634.7	47.2172	862.84	52.7828	869.99	1598.01	54.4421	728.02	45.5579	885.1	1448.54	61.1029	563.44	38.8971	847.86	1987.75	42.6543	1139.89	57.3457
30	0	0	0			0	0.96	4	189	1.5	2	0	0	609.58	1581.11	2190.69	27.8259	72.1741	256.63	665.09	2191.04	30.355	1525.95	69.645	714.75	2207.87	32.3728	1493.12	67.6272	794.15	2333.39	34.0342	1539.24	65.9658	963.79	2731.37	35.286	1767.58	64.714
56	0	3	1	1	5	0	1.02	4.7	190	0.6	1	0	0	516.37	1131.73	1648.1	31.3312	68.6688	79.13	527.96	1547.07	34.1264	1019.11	65.8736	621.75	1540.42	40.3624	918.67	59.6376	654.142	1495.16	43.7507	841.016	56.2493	648.64	1478.55	43.8699	829.912	56.1301
6	1	2	1	2	7	0	1.36	3.4	209	1.1	1	1	0	377	664	1041	36.2152	63.7848	206.19	395	1022	38.6497	627	61.3503	413	953	43.3368	540	56.6632	421	934	45.0749	513	54.9251	506	894	56.5996	388	43.4004
28	0	5	0			0	0.92	3.6	131	0.4	1	0	0	475	1303	1778	26.7154	73.2846	364.87	511	1789	28.5634	1278	71.4366	561	1723	32.5595	1162	67.4405	588	1522	38.6334	934	61.3666	657	1611	40.7821	954	59.2179
10	0	3	0			0	1.05	4	190	0.7	1	0	0	458	866	1324	34.5921	65.4079	199.33	560	1417	39.5201	857	60.4799	695	1431	48.5674	736	51.4326	736	1479	49.7634	743	50.2366	750	1463	51.2645	713	48.7355
47	0	5	1	1	6	1	1.02	3.9	72	0.8	1	0	0	734.04	1132.9	1866.94	39.3178	60.6822	1184.38	780.81	1973.35	39.5677	1192.54	60.4323	768.71	1786.06	43.0394	1017.35	56.9606	807.94	1603.56	50.3841	795.62	49.6159	910.28	1766.39	51.5334	856.11	48.4666
21	0	5	1	1	5	0	1.16	3.9	201	0.7	3	1	0	712	433	1145	62.1834	37.8166	138.29	753	1173	64.1944	420	35.8056	834	1110	75.1351	276	24.8649	827	953	86.7786	126	13.2214	824.33	1037.9	79.4229	213.57	20.5771
15	0	4	1	1	5	0	1.13	4.1	66	0.6	1	1	0	176	1641	1817	9.6863	90.3137	435.9	136	1806	7.53045	1670	92.4695	205	1444	14.1967	1239	85.8033	221	1151	19.2007	930	80.7993	274	1041	26.3208	767	73.6792
64	0	2	1	1	5	0	0.98	4.9	197	1.2	1	0	0	871.14	1039.23	1910.37	45.6006	54.3994	149.91	1000.75	2053.51	48.734	1052.75	51.266	1562.68	2369.88	65.9392	807.2	34.0608	2010.96	2759.85	72.8648	748.89	27.1352	2372.53	3052.52	77.7237	679.99	22.2763
19	0	5	0			0	0.92	3.7	212	0.4	3	0	0	554	1304	1858	29.817	70.183	208.49	575	1774	32.4126	1199	67.5874	666	1782	37.3737	1116	62.6263	653	1494	43.7082	841	56.2918	681	1463	46.5482	782	53.4518
4	0	0	0			0	0.96	4.2	398	0.5	3	0	0	463	1963	2426	19.0849	80.9151	200.888	465	2193	21.2038	1728	78.7962	460	2033	22.6267	1573	77.3733	457	2047	22.3254	1590	77.6746	518	2252	23.0018	1734	76.9982
51	0	2	1	2	7	1	1.2	3.2	92	2	1	1	0	430.84	1529.99	1960.83	21.9723	78.0277	754.07	494.58	2045.27	24.1816	1550.69	75.8184	527.91	1969.37	26.806	1441.46	73.194	637.1	1688.44	37.7331	1051.34	62.2669
54	0	4	1	1	6	0	1.14	3.5	66	1.8	4	0	2	1149.53	848.57	1998.1	57.5312	42.4688	575.85	1206.94	1959.95	61.58	753.012	38.42	1170.81	1730.14	67.6714	559.33	32.3286	1206.49	1723.82	69.9893	517.33	30.0107	997.34	1444.41	69.0483	447.07	30.9517
9	0	4	1	1	6	1	1.21	3.6	95	0.7	1	0	0	535	898	1433	37.3343	62.6657	815.01	502	1366	36.7496	864	63.2504	569.22	1206.82	47.1669	637.6	52.8331	524	1277	41.0337	753	58.9663	938.61	1923.85	48.7881	985.239	51.2119
32	1	1	1	2	7	1	1.15	1.2	114	0.4	1	0	0	492.64	1304.06	1796.7	27.4192	72.5808	208.53	542.37	1753.08	30.9381	1210.71	69.0619	559.31	1559.91	35.8553	1000.6	64.1447	640.37	1534.27	41.7378	893.9	58.2622	684.82	1500.93	45.6264	816.11	54.3736
16	1	2	1	1	5	0	1.07	3.9	81	1.8	1	1	0	400	678	1078	37.1058	62.8942	453.02	397	1110	35.7658	713	64.2342	423	969	43.6533	546	56.3467	514	957	53.7095	443	46.2905	513	839	61.1442	326	38.8558
17	0	1	1	1	6	1	1.04	4.1	72	0.7	1	0	0	1031	930	1961	52.5752	47.4248	835.77	1052	2179	48.279	1127	51.721	1008	1739	57.9643	731	42.0357	1170	1686	69.395	516	30.605	1188	1540	77.1429	352	22.8571
20	0	3	0			0	1.11	4.3	74	0.8	1	1	0	410	1042	1452	28.2369	71.7631	543.256	386	1337	28.8706	951	71.1294	461	1224	37.6634	763	62.3366	508	1133	44.8367	625	55.1633	590.86	1176.34	50.2287	585.48	49.7713
25	0	3	0			0	1	4.4	212	0.6	1	0	0	738	1353	2091	35.2941	64.7059	200.24	904	2220	40.7207	1316	59.2793	1140	2129	53.5463	989	46.4537	1142	1808	63.1637	666	36.8363
43	0	5	1	1	5	0	1.17	4.2	62	0.4	1	1	0	622.08	850.71	1472.79	42.2382	57.7618	456.37	788.61	1640.64	48.0672	852.03	51.9328	720.31	1431.47	50.3196	711.16	49.6804	797.61	1332.98	59.8366	535.37	40.1634	681.97	1165.85	58.4955	483.88	41.5045
38	1	4	0			0	0.92	3.2	264	0.6	1	0	0	489.18	1086.85	1576.03	31.0387	68.9613	213.4	498.39	1487.87	33.4969	989.48	66.5031	813.73	1504.99	54.0688	691.26	45.9312	1003.69	1485.86	67.5494	482.17	32.4506	965.88	1314.2	73.4957	348.32	26.5043
67	1	5	1	1	6	1	1.25	3.6	150	0.7	2	1	0	1151.85	1612.55	2764.4	41.6673	58.3327	474.73	1072.21	2290.57	46.8097	1218.36	53.1903	961.14	1899.56	50.598	938.42	49.402	1064.33	1841.56	57.795	777.23	42.205
57	0	5	1	1	5	0	0.95	4.7	159	0.8	1	0	0	492.794	1034.79	1527.58	32.2598	67.7402	377.622	530.14	1489.13	35.6007	958.99	64.3993	716.69	1642.98	43.6213	926.29	56.3787	1294.55	2638.51	49.0637	1343.96	50.9363
34	0	5	1	2	7	1	1.16	3.4	84	2	2	1	2	442.76	640.83	1083.59	40.8605	59.1395	706.66	518.92	1268.41	40.9111	749.49	59.0889	557.3	1221.8	45.613	664.5	54.387	513.39	1032.55	49.7206	519.16	50.2794	413.14	870.44	47.4634	457.3	52.5366
31	1	6	1	1	6	1	1.29	4	86	1.9	4	0	0	561.55	797.68	1359.23	41.3138	58.6862	1207.86	597.62	1233.26	48.4586	635.64	51.5414	603.01	1304.12	46.2388	701.11	53.7612	550.22	1283.27	42.8764	733.05	57.1236	616.75	1738.04	35.4854	1121.29	64.5146
24	1	0	0			0	0.94	4.5	183	0.4	1	0	0	481	632	1113	43.2165	56.7835	148.806	437	966	45.2381	529	54.7619	604	955	63.2461	351	36.7539	731	967	75.5946	236	24.4054
37	1	0	0			0	1.09	3.7	418	0.5	3	0	0	582.22	1524.42	2106.64	27.6374	72.3626	179.06	628.88	1838.55	34.2051	1209.67	65.7949	675.54	1570.47	43.0151	894.93	56.9849	704.55	1635.46	43.0796	930.91	56.9204	917.78	1860.66	49.3255	942.88	50.6745
52	0	4	1	1	5	0	0.99	4.2	95	0.6	2	0	0	357.27	1483.21	1840.48	19.4118	80.5882	596.79	383.97	1826.48	21.0224	1442.51	78.9776	566.06	1760.47	32.1539	1194.41	67.8461	743.18	1820.86	40.8148	1077.68	59.1852	752.28	1964.1	38.3015	1211.82	61.6985
70	0	5	0			0	1.01	3.9	289	0.4	1	0	0	625.21	1178.19	1803.4	34.6684	65.3316	157.88	657	1785.72	36.7919	1128.72	63.2081	763.96	1693.52	45.1108	929.56	54.8892	811.65	1594.19	50.913	782.54	49.087	908.08	1633.75	55.5826	725.67	44.4174
65	0	2	1	1	5	0	1.05	4.7	120	1	1	0	0	544.4	1720.87	2265.27	24.0325	75.9675	979.01	797.56	2584.66	30.8574	1787.1	69.1426	940.74	2542.55	36.9999	1601.81	63.0001	805.49	2467.78	32.6403	1662.29	67.3597
46	0	5	1	1	5	0	1.1	4.2	153	0.6	2	0	0	955.89	707.01	1662.9	57.4833	42.5167	413.27	1098.54	1812.16	60.6205	713.62	39.3795	1160.55	1747.08	66.428	586.53	33.572	1128.72	1638.72	68.8781	510	31.1219	1236.02	1763.61	70.0847	527.59	29.9153
11	0	2	1	1	6	1	0.99	4.1	62	0.9	2	0	0	1102	1277	2379	46.322	53.678	679.63	1141	2232	51.1201	1091	48.8799	1252	2217	56.4727	965	43.5273	1238	2078	59.5765	840	40.4235	1244	2023	61.4928	779	38.5072
3	0	3	1	1	6	0	0.94	4.2	220	0.3	1	0	0	710	1358	2068	34.3327	65.6673	560.872	810	1992	40.6627	1182	59.3373	919	2005	45.8354	1086	54.1646	1021	2188	46.6636	1167	53.3364
40	0	4	1	1	5	0	1.1	4.4	123	0.6	1	0	3	589.99	1044.83	1634.82	36.089	63.911	321.2	1360.09	2529.85	53.7617	1169.76	46.2383	1601.74	2563.96	62.4713	962.22	37.5287	2018.05	3112.61	64.8347	1094.56	35.1653
27	0	5	1	1	5	0	1.01	4.5	268	0.3	1	0	0	788	1482	2270	34.7137	65.2863	174.97	1072	2564	41.8097	1492	58.1903	1199	2327	51.5256	1128	48.4744	1210	2344	51.6212	1134	48.3788
58	1	0	0			0	0.89	4.6	236	0.5	3	1	0	450.58	1610.11	2060.69	21.8655	78.1345	155.04	538.15	2222.33	24.2156	1684.18	75.7844	728.66	2388.72	30.5042	1660.06	69.4958	789.17	2494.95	31.6307	1705.78	68.3693	896.31	2659.55	33.7016	1763.24	66.2984
69	0	3	1	1	5	0	1.07	4.2	148	0.5	1	0	0	745.58	1096.74	1842.32	40.4696	59.5304	391.94	987.74	2138.25	46.1939	1150.51	53.8061	1083.49	1944.31	55.7262	860.82	44.2738	1132.78	1761.57	64.3051	628.79	35.6949	1211.81	1816.52	66.7105	604.71	33.2895
29	0	5	0			0	0.95	4	209	0.2	2	0	0	397	1094	1491	26.6264	73.3736	274.07	514	1703	30.182	1189	69.818	561	1521	36.8836	960	63.1164	565	1355	41.6974	790	58.3026	606.32	1361.19	44.5434	754.87	55.4566
48	0	4	1	1	5	0	1.01	3.9	169	0.8	1	0	0	559.279	679.091	1238.37	45.1625	54.8375	273.714	714.78	1359.2	52.5883	644.42	47.4117	773.72	1209.48	63.9713	435.76	36.0287	895.62	1241.69	72.1291	346.07	27.8709	976.66	1271.94	76.7851	295.28	23.2149
61	0	5	1	2	7	1	1.17	3.5	39	1.5	1	1	0	487.84	639.58	1127.42	43.2705	56.7295	447.61	578.62	1308.74	44.212	730.12	55.788	683.93	1321.77	51.7435	637.84	48.2565	643.61	1154.45	55.7504	510.84	44.2496	601.02	1082.91	55.5005	481.89	44.4995
39	0	1	1	1	5	0	1.15	4.2	256	0.5	1	0	0	283.58	1221.48	1505.06	18.8418	81.1582	329.8	348.82	1601.32	21.7833	1252.5	78.2167	427.47	1658.77	25.7703	1231.3	74.2297	520.74	1611.8	32.308	1091.06	67.692	574.54	1545.71	37.17	971.17	62.83
13	0	3	1	1	5	0	1.04	4	119	0.4	1	0	2	1040.89	663.436	1704.33	61.0735	38.9265	516.128	1043.61	1664.21	62.709	620.6	37.291	1130.34	1587.68	71.1944	457.34	28.8056	1166.08	1560	74.7485	393.924	25.2515	1167.88	1496.01	78.0663	328.13	21.9337
7	0	3	1	1	5	0	1.1	4.5	152	0.9	1	0	0	274	1039	1313	20.8682	79.1318	200.03	349.71	1270.93	27.5161	921.22	72.4839	375	1234	30.389	859	69.611	421	1227	34.3113	806	65.6887	458	1217	37.6335	759	62.3665
59	0	2	1	1	5	0	1.03	4.2	99	1.3	2	1	0	500.92	683.74	1184.66	42.2839	57.7161	387.53	563.7	1315.95	42.836	752.25	57.164	603.37	1216.33	49.6058	612.96	50.3942	553.11	992.41	55.734	439.3	44.266	585.42	1011.5	57.8764	426.08	42.1236
60	0	2	1	1	5	0	1	4.1	167	0.7	1	0	0	481.94	1137.01	1618.95	29.7687	70.2313	133.71	586.37	1793.33	32.6973	1206.96	67.3027	754.3	1670.82	45.1455	916.52	54.8545	905	1526.49	59.2863	621.49	40.7137	999.36	1522.4	65.6437	523.04	34.3563
63	0	4	0			0	1.02	4.9	178	0.6	1	0	0	237.6	692.12	929.72	25.5561	74.4439	90.91	303.08	990.71	30.5922	687.63	69.4078	280.17	949.16	29.5177	668.99	70.4823	312.99	954.37	32.7955	641.38	67.2045	455.88	1083.28	42.0833	627.4	57.9167
41	0	5	1	1	5	0	1.09	4.5	149	0.5	1	0	0	822	1847.62	2669.62	30.7909	69.2091	499.45	1299.27	3327.25	39.0494	2027.98	60.9506	1395.23	3240.58	43.0549	1845.35	56.9451	1907.65	3265.03	58.4267	1357.38	41.5733
42	0	4	0			0	1.05	4.2	202	0.4	2	0	0	609.06	903.7	1512.76	40.2615	59.7385	195.29	795.08	1753.56	45.3409	958.48	54.6591	801.97	1564.63	51.2562	762.66	48.7438	804.05	1670.27	48.1389	866.22	51.8611	857.63	1640.03	52.2936	782.4	47.7064
66	0	5	1	1	5	0	1.26	3.9	108	1.3	1	1	0	1182.5	1542.44	2724.94	43.3955	56.6045	639.87	1137.04	2502.73	45.432	1365.69	54.568	1248.16	2608.3	47.8534	1360.14	52.1466	1187.42	2091.97	56.7609	904.55	43.2391	1317.97	2060.53	63.9627	742.56	36.0373
1	0	1	1	1	6	1	1.09	4.1	169	0.5	1	0	3	812	831	1643	49.4218	50.5782	1017.36	803	1666	48.1993	863	51.8007	805.78	1607.02	50.1413	801.24	49.8587	826.479	1531.49	53.9659	705.006	46.0341	873.516	1515.39	57.6429	641.875	42.3571
5	0	2	1	2	7	1	1.07	3.8	84	1.7	2	1	1+2	564	674	1238	45.5574	54.4426	892.28	565	1245	45.3815	680	54.6185	595	1201	49.542	606	50.458	524	1133	46.2489	609	53.7511
73	0	3	1	1	5	0	1.06	4.2	69	1.9	1	1	0	593.81	943.2	1537.01	38.6341	61.3659	829.92	664.36	1516.59	43.8062	852.23	56.1938	727.11	1413.82	51.4288	686.71	48.5712	745.77	1318.04	56.5817	572.27	43.4183	806.34	1294.81	62.2748	488.47	37.7252
